# Supplementary material for: Targeting PFKFB3 radiosensitizes cancer cells and suppresses homologous recombination
Source: PubMed Central journal article supplement (PMC6155239; doi:10.1038/s41467-018-06287-x), 2018-09-24
Supplement: 41467_2018_6287_MOESM3_ESM.pdf [file 41467_2018_6287_MOESM3_ESM.pdf]

## Supplementary Data 1

| Compound Name | DiscoverX Gene Symbol      | Entrez Gene Symbol | Percent Control | Compound Concentration (nM) |
|---------------|----------------------------|--------------------|-----------------|-----------------------------|
| KAN0438241    | ABL1(E255K)-phosphorylated | ABL1               | 100             | 2000                        |
| KAN0438241    | ABL1(T315I)-phosphorylated | ABL1               | 100             | 2000                        |
| KAN0438241    | ABL1-nonphosphorylated     | ABL1               | 100             | 2000                        |
| KAN0438241    | ABL1-phosphorylated        | ABL1               | 96              | 2000                        |
| KAN0438241    | ACVR1B                     | ACVR1B             | 100             | 2000                        |
| KAN0438241    | ADCK3                      | CABC1              | 100             | 2000                        |
| KAN0438241    | AKT1                       | AKT1               | 100             | 2000                        |
| KAN0438241    | AKT2                       | AKT2               | 97              | 2000                        |
| KAN0438241    | ALK                        | ALK                | 100             | 2000                        |
| KAN0438241    | AURKA                      | AURKA              | 97              | 2000                        |
| KAN0438241    | AURKB                      | AURKB              | 92              | 2000                        |
| KAN0438241    | AXL                        | AXL                | 100             | 2000                        |
| KAN0438241    | BMPR2                      | BMPR2              | 88              | 2000                        |
| KAN0438241    | BRAF                       | BRAF               | 100             | 2000                        |
| KAN0438241    | BRAF(V600E)                | BRAF               | 97              | 2000                        |
| KAN0438241    | BTK                        | BTK                | 100             | 2000                        |
| KAN0438241    | CDK11                      | CDK19              | 96              | 2000                        |
| KAN0438241    | CDK2                       | CDK2               | 100             | 2000                        |
| KAN0438241    | CDK3                       | CDK3               | 97              | 2000                        |
| KAN0438241    | CDK7                       | CDK7               | 93              | 2000                        |
| KAN0438241    | CDK9                       | CDK9               | 100             | 2000                        |
| KAN0438241    | CHEK1                      | CHEK1              | 89              | 2000                        |
| KAN0438241    | CSF1R                      | CSF1R              | 90              | 2000                        |
| KAN0438241    | CSNK1D                     | CSNK1D             | 100             | 2000                        |
| KAN0438241    | CSNK1G2                    | CSNK1G2            | 97              | 2000                        |
| KAN0438241    | DCAMKL1                    | DCLK1              | 95              | 2000                        |
| KAN0438241    | DYRK1B                     | DYRK1B             | 86              | 2000                        |
| KAN0438241    | EGFR                       | EGFR               | 93              | 2000                        |
| KAN0438241    | EGFR(L858R)                | EGFR               | 90              | 2000                        |
| KAN0438241    | EPHA2                      | EPHA2              | 100             | 2000                        |
| KAN0438241    | ERBB2                      | ERBB2              | 92              | 2000                        |
| KAN0438241    | ERBB4                      | ERBB4              | 96              | 2000                        |
| KAN0438241    | ERK1                       | MAPK3              | 99              | 2000                        |
| KAN0438241    | FAK                        | PTK2               | 96              | 2000                        |
| KAN0438241    | FGFR2                      | FGFR2              | 88              | 2000                        |
| KAN0438241    | FGFR3                      | FGFR3              | 95              | 2000                        |
| KAN0438241    | FLT3                       | FLT3               | 94              | 2000                        |
| KAN0438241    | GSK3B                      | GSK3B              | 91              | 2000                        |
| KAN0438241    | IGF1R                      | IGF1R              | 100             | 2000                        |

|            |                           |          |     |      |
|------------|---------------------------|----------|-----|------|
| KAN0438241 | IKK-alpha                 | CHUK     | 90  | 2000 |
| KAN0438241 | IKK-beta                  | IKBKB    | 86  | 2000 |
| KAN0438241 | INSR                      | INSR     | 92  | 2000 |
| KAN0438241 | JAK2(JH1domain-catalytic) | JAK2     | 99  | 2000 |
| KAN0438241 | JAK3(JH1domain-catalytic) | JAK3     | 100 | 2000 |
| KAN0438241 | JNK1                      | MAPK8    | 91  | 2000 |
| KAN0438241 | JNK2                      | MAPK9    | 82  | 2000 |
| KAN0438241 | JNK3                      | MAPK10   | 100 | 2000 |
| KAN0438241 | KIT                       | KIT      | 100 | 2000 |
| KAN0438241 | KIT(D816V)                | KIT      | 95  | 2000 |
| KAN0438241 | KIT(V559D,T670I)          | KIT      | 86  | 2000 |
| KAN0438241 | LKB1                      | STK11    | 96  | 2000 |
| KAN0438241 | MAP3K4                    | MAP3K4   | 73  | 2000 |
| KAN0438241 | MAPKAPK2                  | MAPKAPK2 | 94  | 2000 |
| KAN0438241 | MARK3                     | MARK3    | 79  | 2000 |
| KAN0438241 | MEK1                      | MAP2K1   | 82  | 2000 |
| KAN0438241 | MEK2                      | MAP2K2   | 85  | 2000 |
| KAN0438241 | MET                       | MET      | 100 | 2000 |
| KAN0438241 | MKNK1                     | MKNK1    | 94  | 2000 |
| KAN0438241 | MKNK2                     | MKNK2    | 93  | 2000 |
| KAN0438241 | MLK1                      | MAP3K9   | 97  | 2000 |
| KAN0438241 | p38-alpha                 | MAPK14   | 100 | 2000 |
| KAN0438241 | p38-beta                  | MAPK11   | 100 | 2000 |
| KAN0438241 | PAK1                      | PAK1     | 100 | 2000 |
| KAN0438241 | PAK2                      | PAK2     | 97  | 2000 |
| KAN0438241 | PAK4                      | PAK4     | 100 | 2000 |
| KAN0438241 | PCTK1                     | CDK16    | 100 | 2000 |
| KAN0438241 | PDGFRA                    | PDGFRA   | 100 | 2000 |
| KAN0438241 | PDGFRB                    | PDGFRB   | 100 | 2000 |
| KAN0438241 | PDPK1                     | PDPK1    | 99  | 2000 |
| KAN0438241 | PIK3C2B                   | PIK3C2B  | 100 | 2000 |
| KAN0438241 | PIK3CA                    | PIK3CA   | 100 | 2000 |
| KAN0438241 | PIK3CG                    | PIK3CG   | 95  | 2000 |
| KAN0438241 | PIM1                      | PIM1     | 96  | 2000 |
| KAN0438241 | PIM2                      | PIM2     | 100 | 2000 |
| KAN0438241 | PIM3                      | PIM3     | 100 | 2000 |
| KAN0438241 | PKAC-alpha                | PRKACA   | 88  | 2000 |
| KAN0438241 | PLK1                      | PLK1     | 91  | 2000 |
| KAN0438241 | PLK3                      | PLK3     | 93  | 2000 |
| KAN0438241 | PLK4                      | PLK4     | 100 | 2000 |
| KAN0438241 | PRKCE                     | PRKCE    | 100 | 2000 |
| KAN0438241 | RAF1                      | RAF1     | 89  | 2000 |
| KAN0438241 | RET                       | RET      | 100 | 2000 |
| KAN0438241 | RIOK2                     | RIOK2    | 98  | 2000 |

|            |                            |         |     |      |
|------------|----------------------------|---------|-----|------|
| KAN0438241 | ROCK2                      | ROCK2   | 92  | 2000 |
| KAN0438241 | RSK2(Kin.Dom.1-N-terminal) | RPS6KA3 | 91  | 2000 |
| KAN0438241 | SNARK                      | NUAK2   | 100 | 2000 |
| KAN0438241 | SRC                        | SRC     | 100 | 2000 |
| KAN0438241 | SRPK3                      | SRPK3   | 92  | 2000 |
| KAN0438241 | TGFBR1                     | TGFBR1  | 100 | 2000 |
| KAN0438241 | TIE2                       | TEK     | 100 | 2000 |
| KAN0438241 | TRKA                       | NTRK1   | 100 | 2000 |
| KAN0438241 | TSSK1B                     | TSSK1B  | 88  | 2000 |
| KAN0438241 | TYK2(JH1domain-catalytic)  | TYK2    | 96  | 2000 |
| KAN0438241 | ULK2                       | ULK2    | 97  | 2000 |
| KAN0438241 | VEGFR2                     | KDR     | 100 | 2000 |
| KAN0438241 | YANK3                      | STK32C  | 91  | 2000 |
| KAN0438241 | ZAP70                      | ZAP70   | 99  | 2000 |
| KAN0438757 | ABL1(E255K)-phosphorylated | ABL1    | 79  | 2000 |
| KAN0438757 | ABL1(T315I)-phosphorylated | ABL1    | 100 | 2000 |
| KAN0438757 | ABL1-nonphosphorylated     | ABL1    | 99  | 2000 |
| KAN0438757 | ABL1-phosphorylated        | ABL1    | 96  | 2000 |
| KAN0438757 | ACVR1B                     | ACVR1B  | 100 | 2000 |
| KAN0438757 | ADCK3                      | CABC1   | 100 | 2000 |
| KAN0438757 | AKT1                       | AKT1    | 100 | 2000 |
| KAN0438757 | AKT2                       | AKT2    | 97  | 2000 |
| KAN0438757 | ALK                        | ALK     | 100 | 2000 |
| KAN0438757 | AURKA                      | AURKA   | 100 | 2000 |
| KAN0438757 | AURKB                      | AURKB   | 88  | 2000 |
| KAN0438757 | AXL                        | AXL     | 97  | 2000 |
| KAN0438757 | BMPR2                      | BMPR2   | 92  | 2000 |
| KAN0438757 | BRAF                       | BRAF    | 100 | 2000 |
| KAN0438757 | BRAF(V600E)                | BRAF    | 95  | 2000 |
| KAN0438757 | BTK                        | BTK     | 100 | 2000 |
| KAN0438757 | CDK11                      | CDK19   | 100 | 2000 |
| KAN0438757 | CDK2                       | CDK2    | 98  | 2000 |
| KAN0438757 | CDK3                       | CDK3    | 100 | 2000 |
| KAN0438757 | CDK7                       | CDK7    | 100 | 2000 |
| KAN0438757 | CDK9                       | CDK9    | 100 | 2000 |
| KAN0438757 | CHEK1                      | CHEK1   | 94  | 2000 |
| KAN0438757 | CSF1R                      | CSF1R   | 100 | 2000 |
| KAN0438757 | CSNK1D                     | CSNK1D  | 92  | 2000 |
| KAN0438757 | CSNK1G2                    | CSNK1G2 | 100 | 2000 |
| KAN0438757 | DCAMKL1                    | DCLK1   | 74  | 2000 |
| KAN0438757 | DYRK1B                     | DYRK1B  | 58  | 2000 |
| KAN0438757 | EGFR                       | EGFR    | 95  | 2000 |
| KAN0438757 | EGFR(L858R)                | EGFR    | 93  | 2000 |
| KAN0438757 | EPHA2                      | EPHA2   | 90  | 2000 |

|            |                           |          |     |      |
|------------|---------------------------|----------|-----|------|
| KAN0438757 | ERBB2                     | ERBB2    | 94  | 2000 |
| KAN0438757 | ERBB4                     | ERBB4    | 99  | 2000 |
| KAN0438757 | ERK1                      | MAPK3    | 100 | 2000 |
| KAN0438757 | FAK                       | PTK2     | 97  | 2000 |
| KAN0438757 | FGFR2                     | FGFR2    | 54  | 2000 |
| KAN0438757 | FGFR3                     | FGFR3    | 100 | 2000 |
| KAN0438757 | FLT3                      | FLT3     | 82  | 2000 |
| KAN0438757 | GSK3B                     | GSK3B    | 89  | 2000 |
| KAN0438757 | IGF1R                     | IGF1R    | 100 | 2000 |
| KAN0438757 | IKK-alpha                 | CHUK     | 91  | 2000 |
| KAN0438757 | IKK-beta                  | IKBKB    | 90  | 2000 |
| KAN0438757 | INSR                      | INSR     | 100 | 2000 |
| KAN0438757 | JAK2(JH1domain-catalytic) | JAK2     | 100 | 2000 |
| KAN0438757 | JAK3(JH1domain-catalytic) | JAK3     | 100 | 2000 |
| KAN0438757 | JNK1                      | MAPK8    | 92  | 2000 |
| KAN0438757 | JNK2                      | MAPK9    | 95  | 2000 |
| KAN0438757 | JNK3                      | MAPK10   | 100 | 2000 |
| KAN0438757 | KIT                       | KIT      | 100 | 2000 |
| KAN0438757 | KIT(D816V)                | KIT      | 94  | 2000 |
| KAN0438757 | KIT(V559D,T670I),KIT      | KIT      | 97  | 2000 |
| KAN0438757 | LKB1                      | STK11    | 100 | 2000 |
| KAN0438757 | MAP3K4                    | MAP3K4   | 42  | 2000 |
| KAN0438757 | MAPKAPK2                  | MAPKAPK2 | 94  | 2000 |
| KAN0438757 | MARK3                     | MARK3    | 82  | 2000 |
| KAN0438757 | MEK1                      | MAP2K1   | 93  | 2000 |
| KAN0438757 | MEK2                      | MAP2K2   | 84  | 2000 |
| KAN0438757 | MET                       | MET      | 100 | 2000 |
| KAN0438757 | MKNK1                     | MKNK1    | 98  | 2000 |
| KAN0438757 | MKNK2                     | MKNK2    | 100 | 2000 |
| KAN0438757 | MLK1                      | MAP3K9   | 100 | 2000 |
| KAN0438757 | p38-alpha                 | MAPK14   | 97  | 2000 |
| KAN0438757 | p38-beta                  | MAPK11   | 100 | 2000 |
| KAN0438757 | PAK1                      | PAK1     | 97  | 2000 |
| KAN0438757 | PAK2                      | PAK2     | 94  | 2000 |
| KAN0438757 | PAK4                      | PAK4     | 89  | 2000 |
| KAN0438757 | PCTK1                     | CDK16    | 100 | 2000 |
| KAN0438757 | PDGFRA                    | PDGFRA   | 100 | 2000 |
| KAN0438757 | PDGFRB                    | PDGFRB   | 100 | 2000 |
| KAN0438757 | PDPK1                     | PDPK1    | 100 | 2000 |
| KAN0438757 | PIK3C2B                   | PIK3C2B  | 100 | 2000 |
| KAN0438757 | PIK3CA                    | PIK3CA   | 100 | 2000 |
| KAN0438757 | PIK3CG                    | PIK3CG   | 93  | 2000 |
| KAN0438757 | PIM1                      | PIM1     | 74  | 2000 |
| KAN0438757 | PIM2                      | PIM2     | 100 | 2000 |

|            |                            |         |     |      |
|------------|----------------------------|---------|-----|------|
| KAN0438757 | PIM3                       | PIM3    | 100 | 2000 |
| KAN0438757 | PKAC-alpha                 | PRKACA  | 100 | 2000 |
| KAN0438757 | PLK1                       | PLK1    | 97  | 2000 |
| KAN0438757 | PLK3                       | PLK3    | 79  | 2000 |
| KAN0438757 | PLK4                       | PLK4    | 100 | 2000 |
| KAN0438757 | PRKCE                      | PRKCE   | 97  | 2000 |
| KAN0438757 | RAF1                       | RAF1    | 100 | 2000 |
| KAN0438757 | RET                        | RET     | 94  | 2000 |
| KAN0438757 | RIOK2                      | RIOK2   | 92  | 2000 |
| KAN0438757 | ROCK2                      | ROCK2   | 97  | 2000 |
| KAN0438757 | RSK2(Kin.Dom.1-N-terminal) | RPS6KA3 | 100 | 2000 |
| KAN0438757 | SNARK                      | NUAK2   | 100 | 2000 |
| KAN0438757 | SRC                        | SRC     | 100 | 2000 |
| KAN0438757 | SRPK3                      | SRPK3   | 96  | 2000 |
| KAN0438757 | TGFBR1                     | TGFBR1  | 100 | 2000 |
| KAN0438757 | TIE2                       | TEK     | 100 | 2000 |
| KAN0438757 | TRKA                       | NTRK1   | 99  | 2000 |
| KAN0438757 | TSSK1B                     | TSSK1B  | 78  | 2000 |
| KAN0438757 | TYK2(JH1domain-catalytic)  | TYK2    | 100 | 2000 |
| KAN0438757 | ULK2                       | ULK2    | 96  | 2000 |
| KAN0438757 | VEGFR2                     | KDR     | 100 | 2000 |
| KAN0438757 | YANK3                      | STK32C  | 100 | 2000 |
| KAN0438757 | ZAP70                      | ZAP70   | 100 | 2000 |
